# Supplementary material for: Increased sialylation and reduced fucosylation of exfoliated cervical cells are potential markers of carcinogenesis in the cervix
Source: publisher site journal article supplement (doi:10.1515/cclm-2015-1014), 2016-04-19
Supplement: Supplementary file 2 [file Supplementary_table.docx]

**Supplementary Table 1:** Reproducibility of ELLA-SNA and ELLA-AAL.

|  | ELLA-SNA | | | | | | ELLA-AAL | | | | | |
| --- | --- | --- | --- | --- | --- | --- | --- | --- | --- | --- | --- | --- |
|  | Inter assay  (triplicates) | | | Intra assay  (triplicates) | | | Inter assay  (triplicates) | | | Intra assay  (triplicates) | | |
| Group | Mean  (O.D.) | SD | CV, % | Mean  (O.D.) | SD | CV, % | Mean  (O.D.) | SD | CV, % | Mean  (O.D.) | SD | CV, % |
| Normal-1 | 0.25 | 0.020 | 8.0 | 0.26 | 0.014 | 5.4 | 0.36 | 0.040 | 11.3 | 0.36 | 0.023 | 6.3 |
| Normal-2 | 0.05 | 0.003 | 5.3 | 0.05 | 0.004 | 7.8 | 0.12 | 0.010 | 8.4 | 0.11 | 0.002 | 1.4 |
| Normal-3 | 0.12 | 0.005 | 3.8 | 0.13 | 0.004 | 2.7 | 0.41 | 0.014 | 3.3 | 0.38 | 0.037 | 9.5 |
| Normal-4 | 0.13 | 0.002 | 1.6 | 0.13 | 0.003 | 2.3 | 0.37 | 0.016 | 4.5 | 0.34 | 0.021 | 6.1 |
| Normal-5 | 0.12 | 0.005 | 3.7 | 0.13 | 0.010 | 7.7 | 0.42 | 0.015 | 3.6 | 0.44 | 0.009 | 2.0 |
| Normal-6 | 0.19 | 0.011 | 6.1 | 0.19 | 0.012 | 6.4 | 0.36 | 0.001 | 0.2 | 0.39 | 0.031 | 7.9 |
| Normal-7 | 0.17 | 0.009 | 5.2 | 0.17 | 0.004 | 2.3 | 0.50 | 0.037 | 7.5 | 0.49 | 0.026 | 5.3 |
| Normal-8 | 0.13 | 0.006 | 4.6 | 0.14 | 0.010 | 7.3 | 0.52 | 0.017 | 3.3 | 0.49 | 0.042 | 8.5 |
| Mean CV of Normal group | 4.8 | | | 5.2 | | | 5.3 | | | 5.9 | | |
| Cancer-1 | 0.04 | 0.001 | 2.6 | 0.04 | 0.001 | 1.3 | 0.16 | 0.012 | 7.4 | 0.17 | 0.016 | 9.2 |
| Cancer-2 | 0.16 | 0.014 | 8.6 | 0.14 | 0.007 | 5.0 | 0.10 | 0.003 | 2.4 | 0.10 | 0.007 | 6.6 |
| Cancer-3 | 0.16 | 0.004 | 2.2 | 0.16 | 0.002 | 1.3 | 0.12 | 0.004 | 3.6 | 0.12 | 0.008 | 6.8 |
| Cancer-4 | 0.18 | 0.010 | 5.4 | 0.18 | 0.004 | 2.0 | 0.14 | 0.004 | 3.0 | 0.14 | 0.007 | 4.8 |
| Cancer-5 | 0.23 | 0.030 | 12.6 | 0.21 | 0.005 | 2.5 | 0.16 | 0.015 | 9.7 | 0.17 | 0.012 | 6.8 |
| Cancer-6 | 0.28 | 0.005 | 1.8 | 0.29 | 0.015 | 5.0 | 0.24 | 0.022 | 9.4 | 0.26 | 0.008 | 3.1 |
| Cancer-7 | 0.25 | 0.006 | 2.3 | 0.26 | 0.011 | 4.4 | 0.12 | 0.009 | 7.6 | 0.13 | 0.008 | 6.0 |
| Cancer-8 | 0.23 | 0.023 | 9.7 | 0.20 | 0.006 | 3.1 | 0.17 | 0.009 | 5.2 | 0.18 | 0.005 | 2.8 |
| Mean CV of cancer group | 5.7 | | | 3.1 | | | 6.0 | | | 5.8 | | |
| Mean CV of  Normal+Cancer  group | 5.3 | | | 4.2 | | | 5.7 | | | 5.9 | | |

Each eight LBC cell lysates were selected from normal or cervical cancer group. ELLAs were performed on the different plates (in triplicate) and same plates (in triplicate) to evaluate inter- and intra-assay precision, respectively. CV, coefficient of variation.
